# Supplementary material for: Preferential CO2 adsorption by an ultra-microporous zinc-aminotriazolato-acetate MOF
Source: Royal Society of Chemistry journal article supplement (doi:10.1039/d3cc01157g), 2023-01-01
Supplement: d3cc01157g1.pdf [file d3cc01157g1.pdf]

**Supporting Information for**

***Preferential CO<sub>2</sub> Adsorption by an Ultra-Microporous Zinc-Aminotriazolato-Acetate MOF***

Piyush Singh,<sup>a,b</sup> Himan Dev Singh,<sup>a,b</sup> Abhijith Hari Menon,<sup>a,b</sup> and Ramanathan Vaidhyanathan<sup>a,b\*</sup>

<sup>a</sup> Department of Chemistry, Indian Institute of Science Education and Research, Dr. Homi Bhabha Rd. Pashan, Pune, 411008. E-mail: vaidhya@iiserpune.ac.in (R.V.).

<sup>b</sup> Centre for Energy Science, Indian Institute of Science Education and Research, Dr. Homi Bhabha Rd. Pashan, Pune, 411008. E-mail: vaidhya@iiserpune.ac.in (R.V.).

**List of contents**

---

**1. Materials and Methods:**

*(a) Synthesis of IISERP-MOF28*

**2. Analytical Characterizations:**

*(a) Single crystal structure determination*

*(b) PXRD analysis*

*(c) TGA analysis*

*(d) IR analysis*

**3. Adsorption studies of IISERP-MOF28**

*(a) Langmuir single site modelling*

*(b) Heat of adsorption for CO<sub>2</sub> from Virial model*

*(c) IAST calculations*

**4. Stability Studies**

**5. Computational Details**

---

## 1. Materials and methods:

All reagents and solvents were purchased from commercial source and used without further purification.

Single-crystal X-ray diffraction was done on a Bruker SMART APEX four-circle diffractometer equipped with a CMOS photon 100 detector and Micro focus ( $1\mu\text{S}$ ) using a  $\text{Cu-K}\alpha$  radiation.

Powder XRDs were done using a Rigaku Miniflex-600 instrument and processed using PDXL software. The Variable temperature powder X-ray diffraction (VT-PXRD) were carried out on a full fledged Bruker instrument using the in-built furnace and in air.

The infrared (IR) spectrum was recorded on a Nicolet FT-170SX instrument using KBr discs in the  $400\text{--}4000\text{ cm}^{-1}$  region.

Field Emission Scanning Electron Microscopic (FESEM) study was done using Ultra Plus Field Emission Scanning Electron Microscope with integral charge compensator and embedded EsB and AsB detectors.

Thermogravimetry analysis of as made MOF was performed on NETSZCH TGA-DSC instrument. The routine TGAs were done under  $\text{N}_2$  gas flow (20 ml/min) (purge + protective) and samples were heated in the temperature range of 25 to  $550\text{ }^\circ\text{C}$  with a heating rate of  $5\text{ }^\circ\text{K min}^{-1}$

All the gas adsorption isotherms were collected from Micromeritics ASAP 2020HD surface area analyzer.

### ***a. Synthesis of IISERP-MOF28***

A solvothermal reaction between Zinc acetate dihydrate (0.5 mmol) and 3-Amino-1,2,4-Triazole (0.5 mmol) in a solution containing 3 ml DMF +3 ml water was carried out at  $150^\circ\text{C}$  for 48hrs. Block shaped colourless crystals were isolated by filtration and washed with plenty of methanol. The air-dried sample gave a yield of ~70% based on Zn. The PXRD pattern indicated this to be a pure phase of IISERP-MOF28. In a single synthesis up to 2g of the MOF was synthesized just by scaling up of the above synthesis.

## 2. Analytical Characterizations:

### ***(a) Single crystal structure determination:***

Single-crystal X-ray diffraction was done on a Bruker SMART APEX four-circle diffractometer equipped with a CMOS photon 100 detector and Micro focus( $1\mu\text{S}$ ) using a  $\text{Cu-K}\alpha$  radiation. The crystal of IISERP-MOF28d was mounted on nylon Cryo loops using Paratone-N oil. Data was collected at 150 (2) K. Total data was integrated using Bruker SAINT Software and using SADABS it was corrected for absorption. Structure was solved using Intrinsic Phasing routine and was refined using the SHELXTL 6.3.1 (2004) software suite. All the non-hydrogen atoms were located from iterative examination of difference F-maps following which the structure was refined using least-squares method. Hydrogen atoms were fixed geometrically in a riding model.

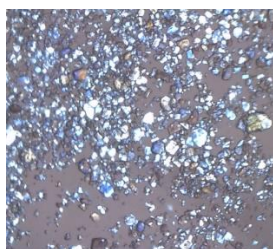

**Photograph S1.** Images of the crystals under an optical microscope.

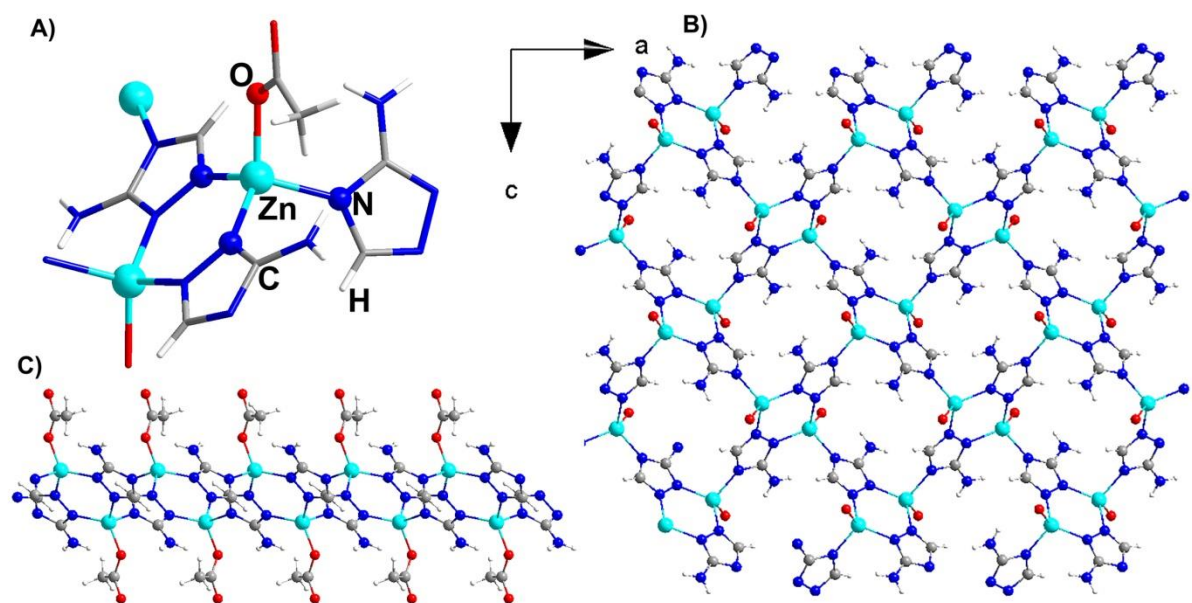

**Angle Between adjacent zinc-triazolate planes**

| Zinc-triazolate MOFs             | $\theta$ | References |
|----------------------------------|----------|------------|
| Porous 3D ZnAtzOx                | 87.385   | 1          |
| 3D ZnAtzCO <sub>3</sub>          | 81.401   | 2          |
| IISERP_MOF28, 3D ZnAtzAcetate    | 77.836   | This work  |
| 2D ZnAtzAcetate                  | 75.501   | 3          |
| Porous 3D ZnAtzOx (dynamic fmwk) | 70.849   | 4          |
| CALF-20, Porous 3D ZntzOx        | 65.525   | 5          |
| 2D ZnAtzFormate                  | 59.097   | 2          |

**Note:** Atz = 3-amino-1,2,4-triazole; tz = 1,2,4-triazole; CO<sub>3</sub> = carbonate; Ox = oxalate.

1. R. Vaidhyanathan, S. S. Iremonger, K. W. Dawson, G. K. Shimizu, *Chem. Commun.*, 2009, **35**, 5230–5232.
2. Y. Lin, Y. Zhang, J. Zhang and X. Chen, *Cryst. Growth Des.*, 2008, **8**, 3673.
3. Z. L. Chen, X. L. Li and F. P. Liang, *J. Solid State Chem.*, 2008, **181**, 2078.
4. A. Banerjee, S. Nandi, P. Nasa and R. Vaidhyanathan, *Chem. Commun.*, 2016, **52**, 1851-54.
5. J.-B. Lin, T. T. T. Nguyen, R. Vaidhyanathan, J. Burner, J. M. Taylor, H. Durekova, F. Akhtar, R. K. Mah, O. Ghaffari-Nik, S. Marx, N. Fylstra, S. S. Iremonger, K. W. Dawson, P. Sarkar, P. Hovington, A. Rajendran, T. K. Woo and G. K. H. Shimizu, *Science*, 2021, **374**, 1464.

**Figure S1.** A) Basic building unit of IISERP-MOF28. Showing the coordination sphere of Zinc, that adopts a tetrahedral geometry. B) Zinc-aminotriazolate layer lying on the ac-plane. Note the oxygens running up-down the layer. C) The layer viewed down the b-axis showing the acetate units running up-down the layer. Color code: Zn- cyan; O- red; C- grey; N- blue and H- white. Bottom: The angle between the planes defined by the Zn<sub>2</sub>tz<sub>2</sub> dimers within the Zn-triazolate layers. This signifies the extent of buckling within the layer. Highly buckled layers enable short pillars to participate in creating a 3D structure.

**Table S1:** Crystallographic Information for IISERP-MOF28

|                                     |              |
|-------------------------------------|--------------|
| a/Å                                 | 9.7110(9)    |
| b/Å                                 | 16.1290(15)  |
| c/Å                                 | 9.7091(9)    |
| α/deg                               | 90           |
| β/deg                               | 90           |
| γ/deg                               | 90           |
| V/Å <sup>3</sup>                    | 1520.72(2)   |
| Crystal System                      | Orthorhombic |
| Space Group                         | Pnma         |
| Color                               | colourless   |
| Expt. Crystal description           | Block shape  |
| Z                                   | 4            |
| T/ K                                | 150 K        |
| Diffraction Source                  | CuKα         |
| Diffraction radiation wavelength/ Å | 1.54178      |
| Diffraction reflection theta min    | 5.3          |
| Diffraction reflection theta max    | 69.1         |
| Diffraction reflection theta full   | 67.79        |
| Reflection number total             | 1463         |
| Reflection number gt                | 1341         |
| R1,wR2 [ <i>I</i> >2σ( <i>I</i> )]  | 0.058, 0.174 |
| R1,wR2(all data)                    | 0.062, 0.178 |
| GoF                                 | 1.115        |

**b. PLATON analysis:**

Total Potential Solvent Accessible Void Vol (SOLV-Map Value) = 302 Å<sup>3</sup>

Unit cell volume, V = 1520.72 Å<sup>3</sup>

Now, Void volume = (302/1520.72) x 100 = ~ 19.85 % of the IISERP-MOF28.

Now, IISERP-MOF28 (1) has a cationic framework with one hydroxide ions per formula unit. So, formula unit present in the crystal structure of the IISERP-MOF28 is Zn<sub>2</sub>(Atz)<sub>2</sub>(Ac)(OH<sup>-</sup>)(H<sub>2</sub>O)<sub>x</sub>(DMF)<sub>y</sub>, where, x,y = any integer represents no of water and dmf molecules.

Z for IISERP-MOF28 is 4.

Hence the unit cell formula is Zn<sub>8</sub>(Atz)<sub>8</sub>(Ac)<sub>4</sub>(OH<sup>-</sup>)<sub>4</sub>(H<sub>2</sub>O)<sub>4x</sub>(DMF)<sub>4y</sub>

From the squeeze result, electrons found in solvent Accessible Void = 42.

Considering 40 electrons for one DMF molecule.

The final Unit Cell formula Zn<sub>8</sub>(Atz)<sub>8</sub>(Ac)<sub>4</sub>(OH<sup>-</sup>)<sub>4</sub>(DMF)<sub>4</sub>

and formula of formula unit is Zn<sub>2</sub>(Atz)<sub>2</sub>(Ac)(OH<sup>-</sup>)(DMF)

DMF weight percentage is 15.7% and from TGA we have approximately 16% weight loss corresponding to DMF.

**(b) Powder X-ray diffraction:**

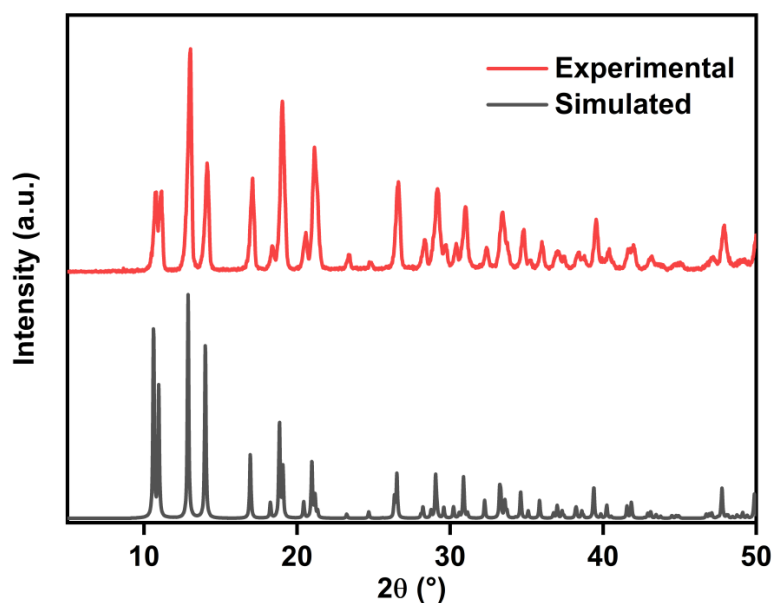

**Figure S2.** The PXRD profile of IISERP-MOF28 indicating the bulk purity of the MOF.

**(c) TGA analysis:**

There is a gradual mass loss up to 230 °C due to loss of solvent molecules trapped in the pore of IISERP-MOF28.

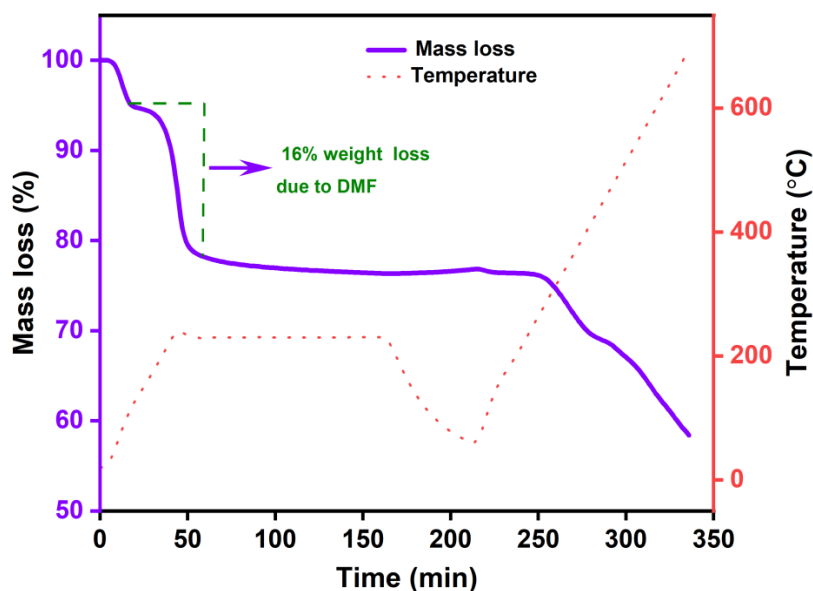

**Figure S3.** TGA of as made IISERP-MOF28 showing the thermal stability upto 260°C. The continuous mass loss upto 230 °C is due to the DMF and water molecules present in the pores of the MOF.

(d) IR analysis:

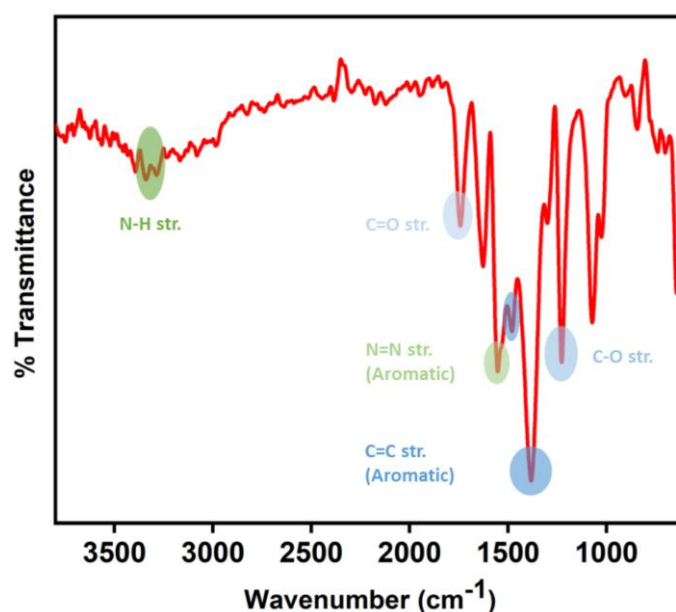

**Figure S4.** Infra-red spectra of IISERP-MOF28, showing the various stretching and bending modes present. Selected peaks: IR ( $\text{cm}^{-1}$ ):  $\nu(\text{N-H})$ : 3230-3395;  $\nu(\text{CO})$ : 1740s;  $\nu(\text{N=N})$ : 1556s;  $\nu(\text{C=C})$ : 1475 and 1380;  $\nu(\text{C-O})$ : 1225.

### 3. Adsorption Analysis

All the gas adsorption analysis were carried out using  $\sim 100$  mg of IISERP-MOF21d Sample was directly activated by evacuation at  $150^\circ\text{C}$  for 24 hrs (10-6 mbar) till an outgas rate was  $\leq 2 \mu\text{bar}/\text{min}$  was achieved. Then the activated MOF was transferred to the analysis port of Micromeritics ASAP 2020HD or 3-FLEX instrument for the gas sorption analysis. Gas analyses were carried out with ultrahigh purity gases ( $\geq 4.8$  grade).

#### Langmuir Fits:

In all cases the isotherms were fit to the Single-Site Langmuir (SSL) equation. The isotherms were fit by solving the Langmuir isotherm equation using the solver function in Microsoft Excel following a similar protocol to Keller *et al.*<sup>S1</sup> Utilizing this routine circumvents some of the problems associated with favouring either high or low pressure regions when linearizing the Langmuir equation<sup>S2</sup> and offers a balanced approach.

#### Single-Site Langmuir (SSL):

$$q_i = q_m \frac{k_i}{1 + k_i P}$$

#### Dual-Site Langmuir (DSL):

$$q_i = q_{m,1} \frac{K_1}{1 + K_1 P} + q_{m,2} \frac{K_2}{1 + K_2 P}$$

#### Ideal Adsorbed Solution Theory (IAST):

IAST calculations were undertaken as described by Prausnitz et al.<sup>53</sup> The selectivity equation involved in calculation is provided below.

**Selectivity:**

$$S_{1,2} = \frac{q_1/q_2}{p_1/p_2}$$

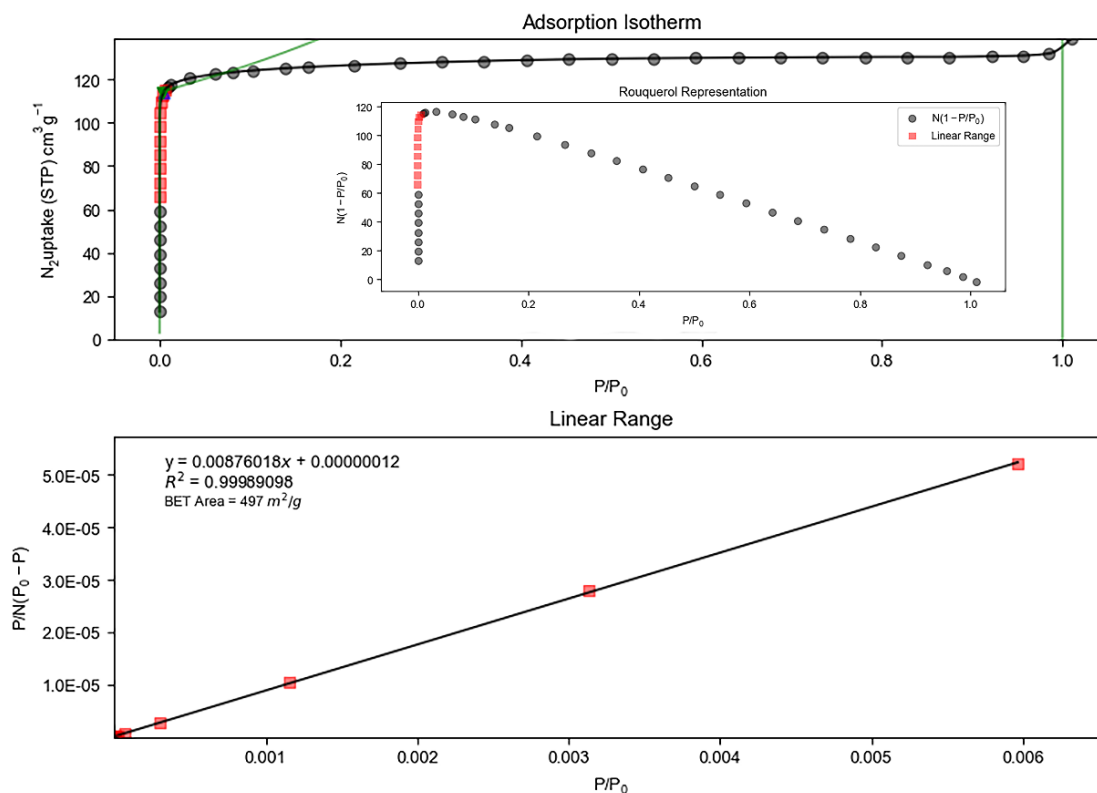

**Figure S5.** BET fit for the IISERP-MOF28 calculated from the 77K N<sub>2</sub> isotherm.

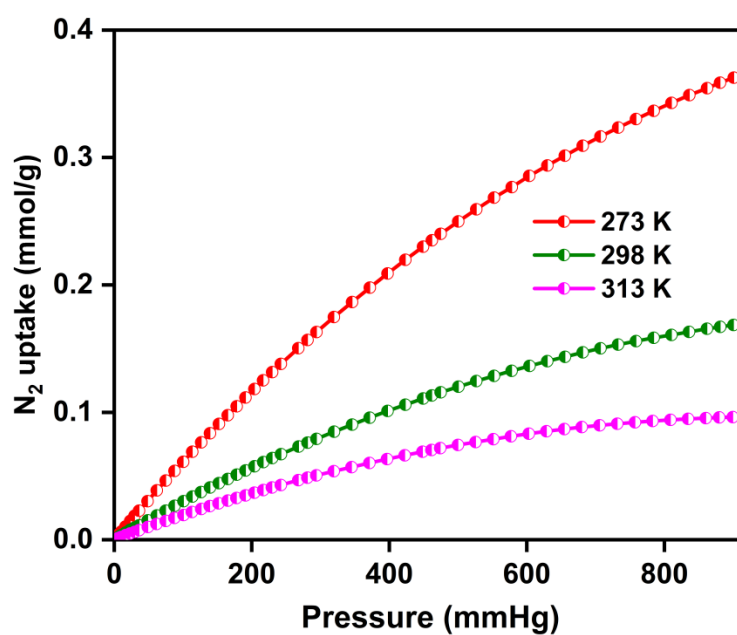

**Figure S6.** N<sub>2</sub> sorption isotherm of IISERP-MOF28 at different temperatures.

**Virial analysis:**

The CO<sub>2</sub> adsorption data were collected from 0-1 bar at 313,298, 283, 273 and 195 K. For virial fitting the 273, 298 and 313 K isotherms were taken and fitted by the virial equation (1).

$$\ln(P) = \ln(V_a) + (A_0 + A_1 \cdot V_a + A_2 \cdot V_a^2 + \dots + A_6 \cdot V_a^6) / T + (B_0 + B_1 \cdot V_a) \dots \dots \dots (1)$$

Where, P is the pressure during experiment, V<sub>a</sub> is amount of gas adsorbed, T is temperature, and A<sub>0</sub>, A<sub>1</sub>, A<sub>2</sub>..., A<sub>4</sub> and B<sub>0</sub>, B<sub>1</sub> are temperature independent empirical parameters.

**Table S2:** Summary of the fitted Virial parameters for IISERP-MOF28.

|                |              |                |             |
|----------------|--------------|----------------|-------------|
| A <sub>0</sub> | -3866.518441 | B <sub>0</sub> | 16.25885602 |
| A <sub>1</sub> | -167.0322344 | B <sub>1</sub> | 0.129610206 |
| A <sub>2</sub> | 120.203798   | B <sub>2</sub> | 0           |
| A <sub>3</sub> | -0.006573956 | B <sub>3</sub> | 0           |
| A <sub>4</sub> | 0.017728823  | B <sub>4</sub> | 0           |

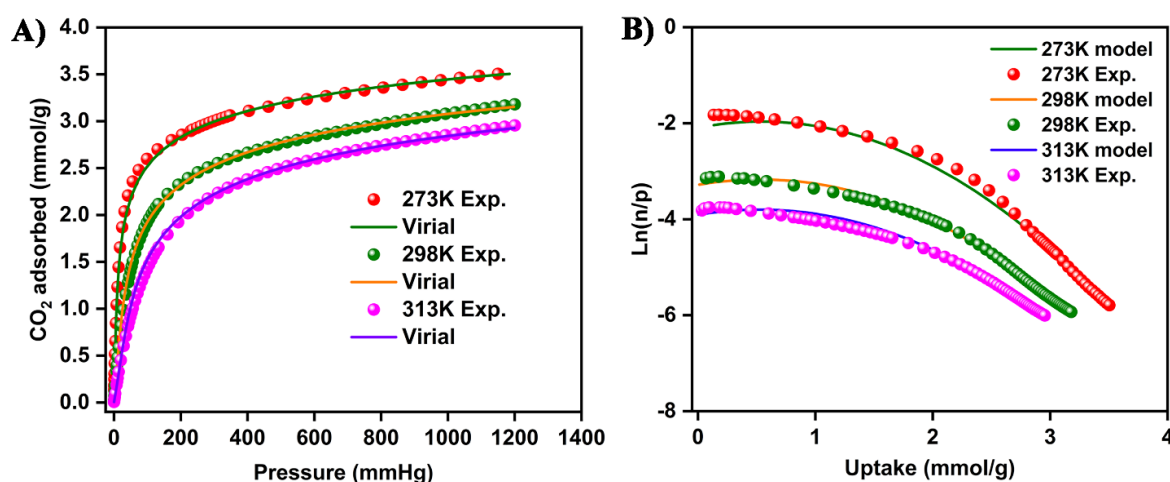

**Figure S7.** (A) Comparison of experimental isotherms of IISERP-MOF28 to the ones obtained from virial modelling carried out using CO<sub>2</sub> isotherms collected at 273, 298 and 313K. (B) Virial plots of IISERP-MOF28 carried out using CO<sub>2</sub> isotherms collected at 273, 298 and 313K.

**IAST selectivities:**

CO<sub>2</sub>/N<sub>2</sub> selectivity was calculated for IISERP-MOF28 using the experimental single component CO<sub>2</sub> and N<sub>2</sub> isotherms and ideal adsorbed solution theory (IAST) with a nominal composition of 15CO<sub>2</sub>:85N<sub>2</sub>. At 1 bar total pressure, and 298K & 313K, conditions of relevance to post combustion CO<sub>2</sub> capture.



**IAST fitting parameters for IISERP-MOF28 (CO<sub>2</sub>/ N<sub>2</sub>):**

**At 298 K**

**Gas A = CO<sub>2</sub>**

**Gas B = N<sub>2</sub>**

**Table S3:** Fitted IAST parameters for CO<sub>2</sub>/N<sub>2</sub> (15CO<sub>2</sub>:85 N<sub>2</sub> composition) selectivity at 298 K for IISERP-MOF28

| Gas A Constants                                             |             | Gas B Constants                                             |             |
|-------------------------------------------------------------|-------------|-------------------------------------------------------------|-------------|
| q <sub>s1</sub> (mmol g <sup>-1</sup> ) =                   | 3.413531176 | q <sub>s1</sub> (mmol g <sup>-1</sup> ) =                   | 4.924949522 |
| q <sub>s2</sub> (mmol g <sup>-1</sup> ) =                   | 0           | q <sub>s2</sub> (mmol g <sup>-1</sup> ) =                   | 0           |
| K <sub>1</sub> (mbar <sup>-1</sup> ) =                      | 0.022334194 | K <sub>1</sub> (mbar <sup>-1</sup> ) =                      | 7.44E-05    |
| K <sub>2</sub> (mbar <sup>-1</sup> ) =                      | 0           | K <sub>2</sub> (mbar <sup>-1</sup> ) =                      | 0           |
| n <sub>1</sub> =                                            | 0.880228916 | n <sub>1</sub> =                                            | 0.906103856 |
| n <sub>2</sub> =                                            | 0           | n <sub>2</sub> =                                            | 0           |
| H <sub>1</sub> (mmol mbar <sup>-1</sup> g <sup>-1</sup> )=  | 0.076238467 | H <sub>1</sub> (mmol mbar <sup>-1</sup> g <sup>-1</sup> )=  | 0.000366619 |
| H <sub>2</sub> (mmol mbar <sup>-1</sup> g <sup>-1</sup> ) = | 0           | H <sub>2</sub> (mmol mbar <sup>-1</sup> g <sup>-1</sup> ) = | 0           |

**At 313 K**

**Gas A = CO<sub>2</sub>**

**Gas B = N<sub>2</sub>**

**Table S4:** Fitted IAST parameters for CO<sub>2</sub>/ N<sub>2</sub> (15CO<sub>2</sub>:85 N<sub>2</sub> composition) selectivity at 313K for IISERP-MOF28 .

| Gas A Constants                                             |             | Gas B Constants                                             |             |
|-------------------------------------------------------------|-------------|-------------------------------------------------------------|-------------|
| q <sub>s1</sub> (mmol g <sup>-1</sup> ) =                   | 3.240186165 | q <sub>s1</sub> (mmol g <sup>-1</sup> ) =                   | 2.000428068 |
| q <sub>s2</sub> (mmol g <sup>-1</sup> ) =                   | 0           | q <sub>s2</sub> (mmol g <sup>-1</sup> ) =                   | 0           |
| K <sub>1</sub> (mbar <sup>-1</sup> ) =                      | 0.007958866 | K <sub>1</sub> (mbar <sup>-1</sup> ) =                      | 6.89E-05    |
| K <sub>2</sub> (mbar <sup>-1</sup> ) =                      | 0           | K <sub>2</sub> (mbar <sup>-1</sup> ) =                      | 0           |
| n <sub>1</sub> =                                            | 0.939317452 | n <sub>1</sub> =                                            | 0.903488549 |
| n <sub>2</sub> =                                            | 0           | n <sub>2</sub> =                                            | 0           |
| H <sub>1</sub> (mmol mbar <sup>-1</sup> g <sup>-1</sup> )=  | 0.025788208 | H <sub>1</sub> (mmol mbar <sup>-1</sup> g <sup>-1</sup> )=  | 0.000137783 |
| H <sub>2</sub> (mmol mbar <sup>-1</sup> g <sup>-1</sup> ) = | 0           | H <sub>2</sub> (mmol mbar <sup>-1</sup> g <sup>-1</sup> ) = | 0           |

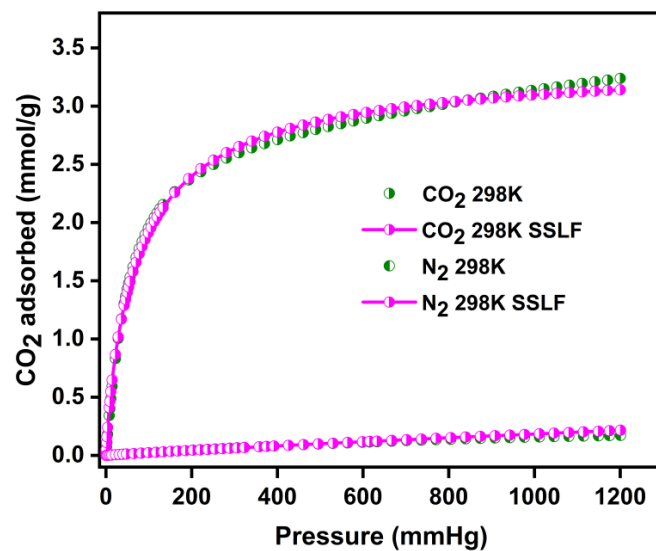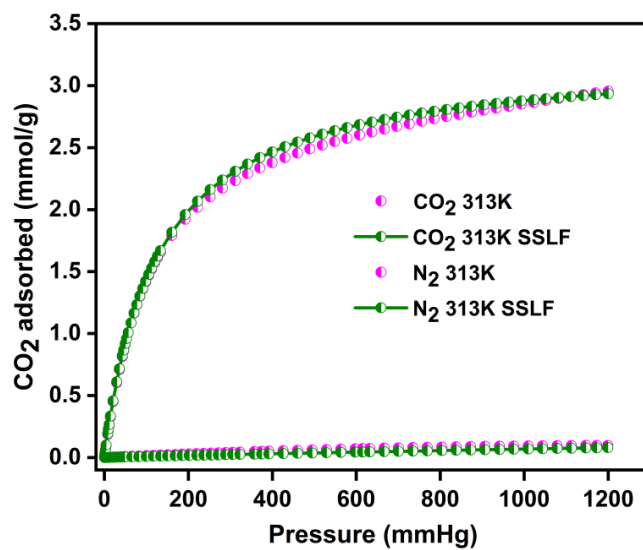

Figure S8. IAST fitting of CO<sub>2</sub> and N<sub>2</sub> isotherms for IISERP-MOF28 collected at 298 and 313 K.

#### 4. Stability Studies

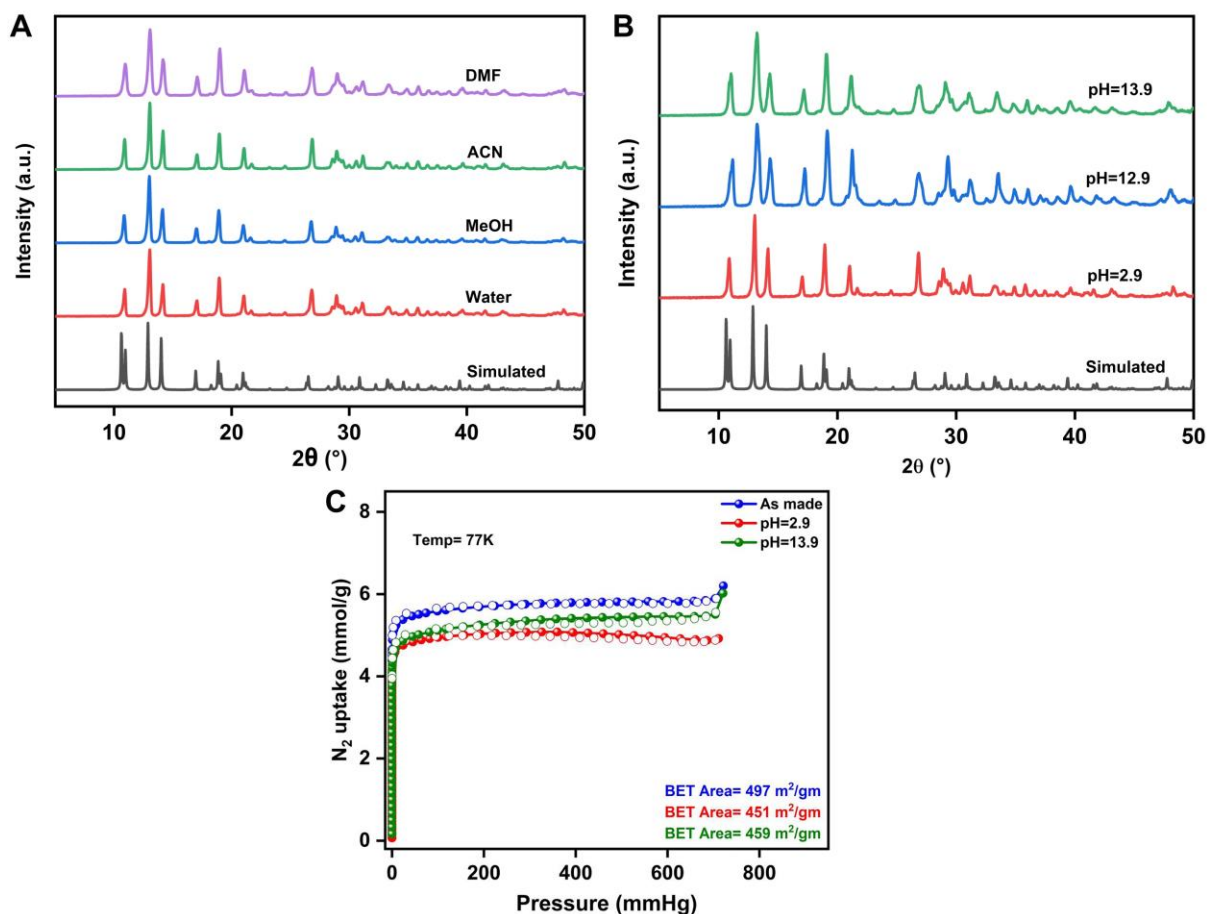

**Figure S9.** (A) After soaking for 20 days, PXRD profiles demonstrate the stability of IISERP-MOF28 in various solvents. (B) PXRD patterns of post acid-base treatment of the MOF. (C) 77K liquid  $N_2$  adsorption isotherms of the MOF after treating with acid and base for 15 days.

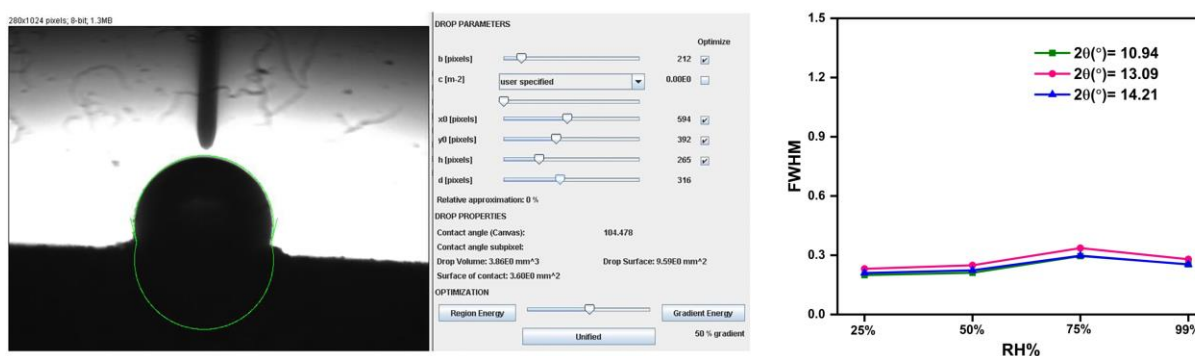

**Figure S10.** Left: Contact angle measurement for water on IISERP-MOF28. Right: FWHM plot of IISERP-MOF28 at different relative humidity condition at constant temperature.

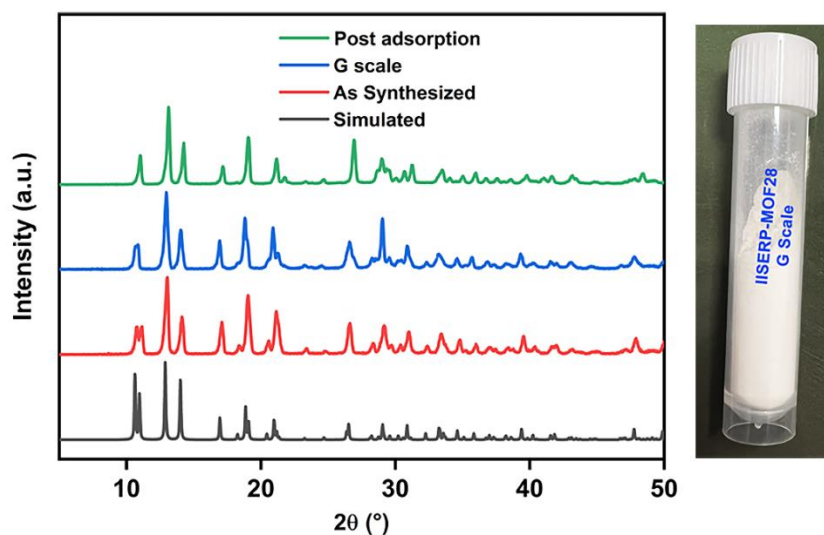

**Figure S11.** A comparative PXRD plot showing the bulk purity of the gram scale synthesis and the stability of the MOF to the repeated adsorption-desorption and evacuation cycles. Note: This material can be scaled up to 4 gram in a single synthesis.

**Table S5:** Comparison of the adsorption characteristics of **1** with some of the leading CO<sub>2</sub> capturing MOFs.

| MOF                                                          | CO <sub>2</sub> capacity at 298 K (mmol/g) |         | HOA (kJ/mol) | ref                                           |
|--------------------------------------------------------------|--------------------------------------------|---------|--------------|-----------------------------------------------|
|                                                              | 0.15 bar                                   | 1.0 bar |              |                                               |
| IISERP-MOF28                                                 | 2.2                                        | 3.1     | 32           | <i>This work</i>                              |
| Calf-20 (303 K)                                              | 2.5                                        | 3.54    | 39           | <i>Science 2021, 374, 1464–1469</i>           |
| ALF                                                          | 2.7                                        | 3.98    | 47.9         | <i>Sci. Adv., 2022, 1473</i>                  |
| Zn-Atz_Ox (293 K)                                            | 2.1                                        | 3.65    | 40           | <i>Science 2010, 330, 650.</i>                |
| IISERP-MOF2 (303 K)                                          | 1.6                                        | 4.1     | 33           | <i>J. Am. Chem. Soc. 2017, 139, 1734–1737</i> |
| ZnF(daTZ)                                                    | 0.96                                       | 3.3     | 33           | <i>J. Am. Chem. Soc. 2020, 142, 2750–2754</i> |
| mmen-Mg <sub>2</sub> (dobpdc)                                | 3.2                                        | 3.9     | 75           | <i>J. Am. Chem. Soc. 2012, 134, 7056.</i>     |
| Zn <sub>3</sub> (Atz) <sub>3</sub> (PO <sub>4</sub> ) (273K) | 1.76                                       | 3.16    | 30           | <i>Angew. Chem. 2012, 124, 1862.</i>          |
| UTSA-16                                                      | 2.54                                       | 4.4     | 37           | <i>ACS-AMI 2017, 9, 455.</i>                  |
| MAF66                                                        | 1.29                                       | 4.41    | 26           | <i>Inorg. Chem. 2012, 51, 9950–9955</i>       |

|                                           |      |      |      |                                            |
|-------------------------------------------|------|------|------|--------------------------------------------|
| Zn <sub>2</sub> (TRZ) <sub>2</sub> (Fuma) | 1.32 | 3.92 | 27   | <i>Fuel</i> , 2022                         |
| SIFSIX-3-Zn                               | 2.38 | 2.55 | 46   | <i>Nat. Commun.</i> 2014, 5, 4228.         |
| SIFSIX-3-Cu                               | 2.45 | 2.6  | 53   | <i>Nat. Commun.</i> 2014, 5, 4228.         |
| MIL-101(Cr)                               | 0.6  | 2.25 | 32   | <i>Chem. Eng. Sci.</i> 2016, 147, 109.     |
| NH <sub>2</sub> -MIL-53(Al)               | 0.9  | 1.5  | 38.4 | <i>J. Am. Chem. Soc.</i> 2009, 131, 6326.  |
| MIL-91(Ti)                                | 1.5  | 3.5  | 44   | <i>J. Mater. Chem. A</i> 2016, 4, 1383     |
| CAU-1                                     | 1.1  | 4.0  | 48   | <i>Energy Environ. Sci.</i> 2011, 4, 4522. |
| bio-MOF-13                                | 1.0  | 2.0  | 41   | <i>Chem. Sci.</i> 2013, 4, 1746.           |
| bio-MOF-12                                | 1.34 | 3.15 | 39   | <i>Chem. Sci.</i> 2013, 4, 1746.           |
| JUC-132-Cd                                | 0.65 | 1.71 | 30.3 | <i>Chem. Commun.</i> 2015, 51, 9463.       |

### 5. Computational details:

All computational calculations and simulations were performed using the Accelrys (Materials Studio V 8.0) software. An adsorption isotherm was simulated using the GCMC routine embedded in the sorption algorithm of the Materials Studio software.(S4-S7) For these 1000000, equilibration steps were calculated and the Metropolis algorithm with Drieding forcefield was used. The Lennard–Jones equation, with a cut-off radius of 18.5 Å, was used to calculate the van der Waals interactions. The long-range electrostatic interactions and Coulomb interactions were both obtained by three-dimensional Ewald & Group methods, with the accuracy of 1.0 e-5 kcal/mol. The calculations were repeated three times to establish the error-bar (see Figure 4B of the main text). Following this, the favorable positions for the CO<sub>2</sub> within the MOF were identified using the Simulated Annealing routines embedded in the Materials Studio. A Smart algorithm was employed. A total of 10 cycles with 100000 steps/cycle were used to achieve the low-energy configurations. Charges were calculated using the Qeq charge equilibration method. The above simulations all conducted by the Sorption of the Materials Studio package.

Separately, the binding energy for the various zinc-triazolate MOFs were calculated using the DMOL<sup>3</sup> module of the Accelrys. In all cases large super cells ~ 3 x 3 x3 were employed. A high tolerance of 1x10<sup>-6</sup> for the SCF convergence and high electrostatic, van der waal and hydrogen-bond cut offs were used.(S8,S9) UFF-based Lennard-Jones dispersion corrections were included in Energy, Force and Displacement calculations. All calculations are at 0 K and were spin-unrestricted, adopting the formal spin as the initial spin. Core elements were treated with all-electron pseudopotentials and

the DNP basis set with a basis cut-off of 3.7 Å. For our dispersion corrections, we used Generalized Gradient Approximation (GGA) for calculating the exchange and the correlation energies and employed the Perdew-Wang 91 (PW91) functional.(S10) Density mixing was done using the Pulay scheme. The final configuration considered in the analysis converged well. We used this final optimized structure for the molecular dynamics simulations.

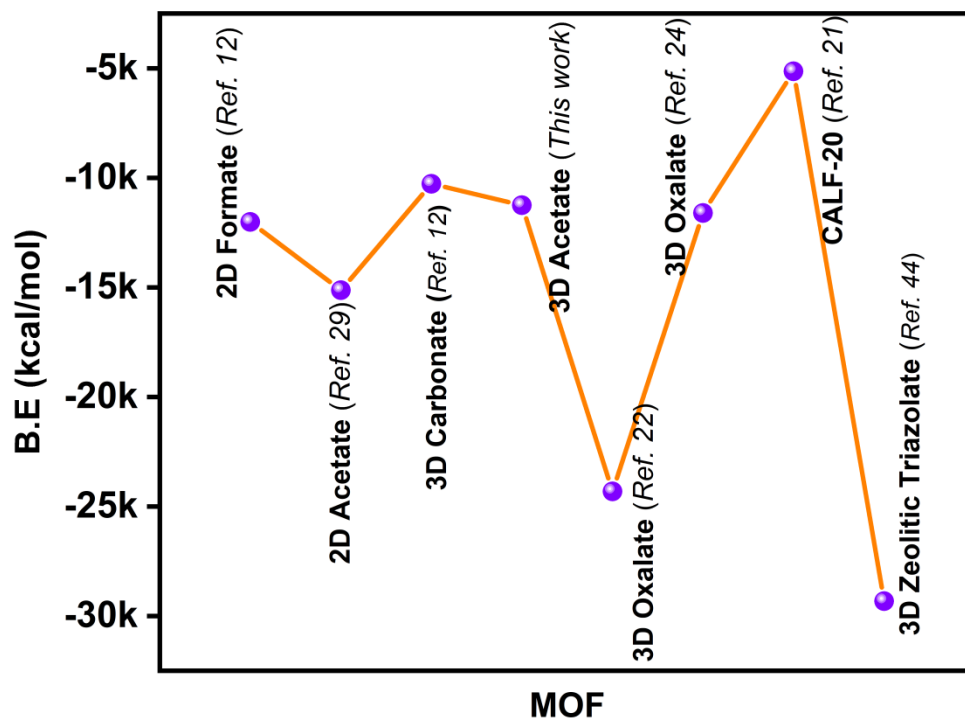

**Figure S12.** Calculated binding energies for different zinc-triazolate MOFs. Note: The references correspond to the references in the maintext.

To analyze the adsorption sites of CO<sub>2</sub> on the MOF, we used radial distribution functions (RDFs) extracted from detailed MD simulations carried out using the Forcite Dynamics. The lowest energy configuration from the simulated annealing routine was applied as the input for the MD. A 10 ns NPT MD simulation (1.0 fs time step; T = 298K; P = 1bar for CO<sub>2</sub>) was used to reach the equilibrium state; the framework was allowed to relax. Then a 10 ns NVE MD simulation (1.0 fs time step) was used to obtain the final configuration at the lowest energy state. This was used to calculate the RDF.(S11, S12)

#### References:

- (S1) Kemmer, G.; Keller, S. Nat. Protoc. 2010, 5, 267–81.
- (S2) Richter, E.; Schuetz, W.; Myers, A. L. Chem. Eng. Sci. 1989, 44, 1609–1616.
- (S3) Myers, A. L.; Prausnitz, J. M. AIChE J. 1965, 11, 121–127.
- (S4) Cerný, V. "A thermodynamical approach to the travelling salesman problem: an efficient simulation algorithm", J. Optim. Theor. Appl., 45, 41-51 (1985).
- (S5) Frenkel, D.; Smit, B. Understanding Molecular Simulation: From Algorithms to Applications, 2nd Edition, Academic Press: San Diego (2002).
- (S6) Kirkpatrick, S.; Gelatt, C. D.; Vecchi, M. P. "Optimization by Simulated Annealing", Science, 220, no. 4598, 671-680 (1983).
- (S7) Metropolis, N.; Rosenbluth, A. W.; Rosenbluth, M. N.; Teller, A. H.; Teller, E. "Equation of State Calculations by Fast Computing Machines", J. Chem. Phys., 21, 1087 (1953).
- (S8) B. Delley, J. Chem. Phys. 92, 508 (1990).
- (S9) Delley: J. Phys. Chem. 100, 6107 (1996).

- (S10) P91 exchange: Perdew, Physica B 172, 1 (1991).  
(S11) Rappé, A. K.; Goddard, W. A., J. Phys. Chem., 95, 3358 (1991).  
(S12) Ray, J. R. Comput. Phys. Rep., 8, 109 (1988) and references therein.
